# Supplementary material for: In Vitro Characterization of the Physical Interactions between the Long Noncoding RNA TERRA and the Telomeric Proteins TRF1 and TRF2
Source: Int J Mol Sci. 2022 Sep 9;23(18):10463. doi: 10.3390/ijms231810463 (PMC9500956; doi:10.3390/ijms231810463)
Supplement: Supplementary file 1 [file ijms-23-10463-s001.zip › ijms-1880340-supplementary.pdf]

## Supplementary Material for

### *In vitro* characterization of the physical interactions between the long noncoding RNA TERRA and the telomeric proteins TRF1 and TRF2

Patricia L. Abreu, Yong Woo Lee, Claus M. Azzalin

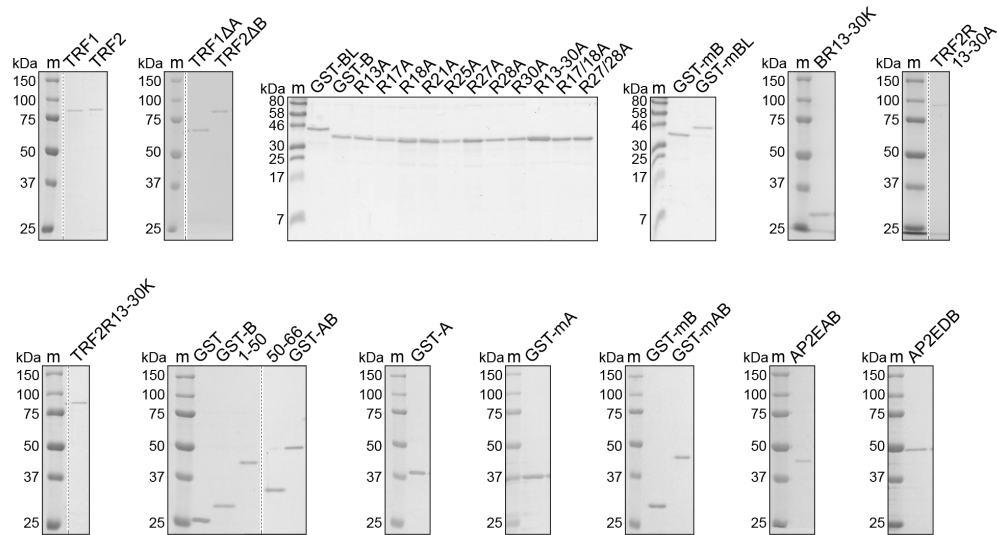

**Supplementary Figure S1.** Recombinant proteins used in this study. Recombinant proteins were size-fractionated by SDS-PAGE and stained with BlueSafe reagent. Molecular weights of size markers (m) are on the left of each gel in kDa.

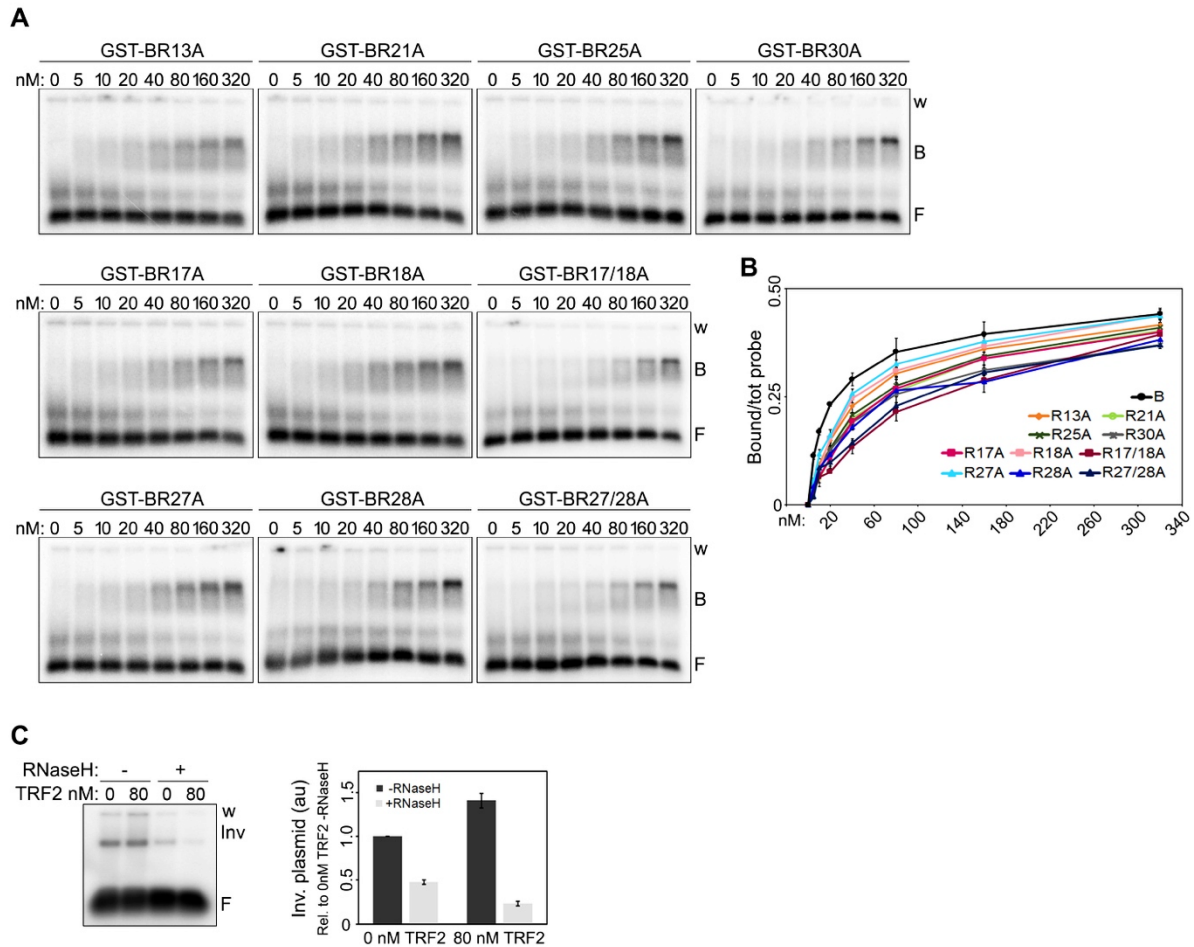

**Supplementary Figure S2.** Binding of human B substitution mutants to TERRA (related to Figure 3) and RNaseH controls for plasmid invasion assays (related to Figure 4). **(A)** EMSAs with radiolabeled (UUAGGG)<sub>5</sub> TERRA oligonucleotides (0.25 nM) and increasing amounts of the indicated recombinant proteins. GST, glutathione S-transferase; B, bound probe; F, free probe; w, wells. **(B)** Bound oligonucleotides were quantified and graphed as fraction of the total signal within each lane. Data points are means and error bars are SDs (n=3 independent experiments except for GST-B18A and GST-B28A for which n=2). **(C)** A plasmid containing a 1.2 kb long telomeric repeat sequence (0.15 nM) was incubated with radiolabeled (UUAGGG)<sub>5</sub> TERRA oligonucleotides (1 nM) in the presence or absence of TRF2 (80 nM) and of RNaseH (60U). Inv, invaded plasmid; F, free probe; w, wells. Invaded plasmids were quantified as the fold difference compared with sample lacking TRF2 and RNaseH. Bars are means and error bars are SDs (n=2 independent experiments).
